# Supplementary material for: Unstable Housing and Mortality Among US Veterans Receiving Dialysis
Source: PubMed Central journal article supplement (PMC10663965; doi:10.1001/jamanetworkopen.2023.44448), 2023-11-21
Supplement: jamanetwopen-e2344448-s001.pdf [file jamanetwopen-e2344448-s001.pdf]

## Supplementary Online Content

Novick TK, Mader MJ, Johansen KL, et al. Unstable housing and mortality among US veterans receiving dialysis. *JAMA Netw Open*. 2023;6(11):e2344448. doi:10.1001/jamanetworkopen.2023.44448

**eTable 1.** Baseline Study Population Characteristics: Included vs Excluded Participants

**eAppendix.** Exposure Definition

**eTable 2.** Exposure Definition

**eTable 3.** Data Sources

**eTable 4.** *International Classification of Diseases (ICD)* Codes for Covariables

**eTable 5.** Outcomes at Various Time Points for Individuals With and Without Unstable Housing

**eTable 6.** Hazard of All-Cause Mortality Associated With Unstable Housing for Various Ages

**eTable 7.** Sensitivity Analysis: Analysis Without Age × Unstable Housing Interaction Term

**eTable 8.** Sensitivity Analysis: Including Individuals Aged Older Than 85 Years

**eTable 9.** Sensitivity Analysis: Analysis With Age as a Categorical Variable

**eTable 10.** Sensitivity Analysis: Sample Limited to Participants Who Did Not Have Discrepancies Between US Renal Data System and Veterans Health Administration Data on Date of Death

**eTable 11.** Sensitivity Analysis: Sample Limited to Participants Who Were Screened for Unstable Housing Within 1 Year Before Dialysis Initiation

This supplementary material has been provided by the authors to give readers additional information about their work.

**eTable 1.** Baseline Study Population Characteristics: Included vs Excluded Participants

| Characteristic                     | Included       | Excluded       |
|------------------------------------|----------------|----------------|
| N                                  | 25,689         | 10,937         |
| Age group, years, n (%)            |                |                |
| <50                                | 1,048 (4.08)   | 436 (3.99)     |
| 50-64                              | 7,214 (28.08)  | 2,593 (23.71)  |
| 65-74                              | 11,405 (44.40) | 3,744 (34.23)  |
| ≥75                                | 6,022 (23.44)  | 4,164 (38.07)  |
| Sex, n (%)                         |                |                |
| Female                             | 598 (2.30)     | 213 (1.95)     |
| Male                               | 25,091 (97.67) | 10,724 (98.05) |
| Race and Ethnicity, n (%)          |                |                |
| Black                              | 8,108 (31.56)  | 3,053 (27.91)  |
| Hispanic                           | 1,751 (6.82)   | 961 (8.79)     |
| Other                              | 2,445 (9.52)   | 960 (8.78)     |
| White                              | 13,385 (52.10) | 5,963 (54.52)  |
| Year of dialysis initiation, n (%) |                |                |
| 2012                               | 555 (2.16)     | 827 (7.56)     |
| 2013                               | 3,629 (14.13)  | 2,019 (18.46)  |
| 2014                               | 4,204 (16.36)  | 1,544 (14.12)  |
| 2015                               | 4,690 (18.26)  | 1,472 (13.46)  |
| 2016                               | 4,592 (17.88)  | 1,505 (13.76)  |
| 2017                               | 4,539 (17.67)  | 1,352 (12.36)  |
| 2018                               | 3,480 (13.55)  | 2,218 (20.28)  |
| Cause of Kidney Failure, n (%)     |                |                |
| Cystic kidney disease              | 455 (1.77)     | 169 (1.55)     |
| Diabetes                           | 13,657 (53.16) | 4,498 (41.13)  |
| Hypertension                       | 7,305 (28.44)  | 3,267 (29.87)  |
| GN                                 | 1,507 (5.87)   | 627 (5.73)     |
| Other                              | 2,385 (9.28)   | 1,323 (12.10)  |
| Unknown                            | 380 (1.48)     | 1,053 (9.63)   |
| Incident dialysis modality, n (%)  |                |                |
| In-center Hemodialysis             | 23,482 (91.41) | 9,905 (90.56)  |
| Home Hemodialysis                  | 199 (0.77)     | 73 (0.67)      |
| Peritoneal dialysis                | 2,007 (7.81)   | 808 (7.39)     |
| Unknown                            | 1 (0.0)        | 151 (1.38)     |

## **eAppendix.** Exposure Definition

We defined unstable housing using the data collected from the Homelessness Screening Clinical Reminder. The Homelessness Screening Clinical Reminder is embedded within the Veterans Health Administration (VHA) electronic medical record, Computerized Patient Record System. It is placed on the cover sheet for all patients at every VA Medical Center. Any staff member can perform the screen. The screen is administered annually at outpatient clinics. Veterans that screen positive (currently homeless or being in imminent danger of homelessness) are then screened every 6 months. Indicating that someone is a resident of a long-term care facility sets the frequency to every 2 years. Once a Veteran has screened negative for homelessness three (3) consecutive times, the frequency changes to every 2 years. The reminder excludes Veterans if a visit is found within the last 6 months in a clinic associated with any of the stop codes indicative of homeless services.

The Homelessness Screening Clinical Reminder started in late 2012 after the President of the United States and Secretary of the Department of Veterans Affairs made it a priority to eliminate homelessness in the Veteran population. There are 130 health care systems (HCS) within the VHA, and not all HCS began using the screen at the same time. Each HCS had the option to add questions to their screen, if appropriate. In order for a Veteran to have a screen they would have attended an appointment at a VHA facility that was administering the Homelessness Screening Clinical Reminder.

VHA data is stored in the Corporate Data Warehouse as health factors. There are no enterprise-wide naming conventions, formatting, or standards requirements for

health factors, and no functionality exists to designate, for example, a health factor as “national”. Someone at the national level might suggest for individual HCS’s to start using and document health factors, but each HCS has some flexibility to decide if and when to start using them, and what specific language will be recorded for the health factor.

We used database queries to investigate which health factor statements for the Homelessness Screening Clinical Reminder have been used over time and at which locations. We found 43 different statements associated with the health factor category called “Homelessness Screening,” although many of the statements were associated with food insecurity. The time span of interest was from Oct 2012 to Sept 2019. Below is a summary of the Homelessness Screening health factors identified specifically related to unstable housing, and whether we included them in our exposure definition.

**eTable 2.** Exposure Definition

| HCS          | Time in Use             | Clinical Reminder                                                                                                                                                                                                                                                                                                                                                                                                                                                                                                                                                                                                                                                                                                      | Health Factor                                                                                                                                                                                                                                                                                                                                                                                                                                                                                                                                                                    | Whether/how Included in Definition of Unstable housing                                                                                                                                                            |
|--------------|-------------------------|------------------------------------------------------------------------------------------------------------------------------------------------------------------------------------------------------------------------------------------------------------------------------------------------------------------------------------------------------------------------------------------------------------------------------------------------------------------------------------------------------------------------------------------------------------------------------------------------------------------------------------------------------------------------------------------------------------------------|----------------------------------------------------------------------------------------------------------------------------------------------------------------------------------------------------------------------------------------------------------------------------------------------------------------------------------------------------------------------------------------------------------------------------------------------------------------------------------------------------------------------------------------------------------------------------------|-------------------------------------------------------------------------------------------------------------------------------------------------------------------------------------------------------------------|
| All 130 HCSs | October 2012 to present | <ol style="list-style-type: none"> <li>1. For the past 2 months, have you been living in stable housing that you own, rent, or stay in as part of a household?</li> <li>2. Are you worried or concerned that in the next 2 months you may not have stable housing that you own, rent, or stay in as part of a household?</li> <li>3. Screen not performed: Already receiving homeless services or assistance</li> <li>4. Screen not performed: Long term resident of nursing home/LTC Facility</li> <li>5. Screen not performed: Declines screening at this time</li> <li>6. Screen not performed: Veteran/Caregiver unable to answer</li> <li>7. Would you like to talk more about your housing situation?</li> </ol> | <ol style="list-style-type: none"> <li>1a. Negative - has stable housing</li> <li>1b. Positive - has no stable housing</li> <li>2a. Positive - has worries about housing</li> <li>2b. Negative - has no housing concerns</li> <li>3. Already receiving assistance with housing</li> <li>4. Nursing home resident</li> <li>5. Declines homeless screen</li> <li>6. Unable to perform homeless screen</li> <li>7a. Referred to homeless program</li> <li>7b. Declined homeless referral</li> <li>7c. Referred to social work</li> <li>7d. Declines social work referral</li> </ol> | <p>Included:</p> <ul style="list-style-type: none"> <li>- housing secure: 1a, 2b, 4</li> <li>- housing insecure: 1b, 2a</li> </ul> <p>Not included:</p> <ul style="list-style-type: none"> <li>-3, 5-7</li> </ul> |
| HCS 585 only | April 2015 to present   | Same questions as in first row, with additional possible responses                                                                                                                                                                                                                                                                                                                                                                                                                                                                                                                                                                                                                                                     | <ol style="list-style-type: none"> <li>2c. Housing concern no</li> <li>2d. Housing concern yes declines referral</li> </ol>                                                                                                                                                                                                                                                                                                                                                                                                                                                      | <p>Included</p> <ul style="list-style-type: none"> <li>- housing secure: 2c</li> <li>- housing insecure: 2d, 2e</li> </ul>                                                                                        |

|                    |                        |                                                                          |                                                                                                    |                                                             |
|--------------------|------------------------|--------------------------------------------------------------------------|----------------------------------------------------------------------------------------------------|-------------------------------------------------------------|
|                    |                        |                                                                          | 2e. Housing concern yes referred                                                                   |                                                             |
| HCS<br>646<br>only | Oct 2012 -<br>Aug 2016 | Same questions as in first row,<br>with additional possible<br>responses | 1c. Homeless currently<br>2c. Homeless future housing<br>concern<br>7e. Homeless referral declined | Included<br>- housing secure:<br>- housing insecure: 1c, 2c |
| HCS<br>691<br>only | Sept 2013 -<br>present | Same questions as in first row,<br>with additional response              | 1c. Homeless on admission                                                                          | Included as housing insecure                                |

**eTable 3. Data Sources**

| Variable                     | Data Source                                                                                                                                                                                                                                                                                                                                                                                                                                                                                  |
|------------------------------|----------------------------------------------------------------------------------------------------------------------------------------------------------------------------------------------------------------------------------------------------------------------------------------------------------------------------------------------------------------------------------------------------------------------------------------------------------------------------------------------|
| Age/Date of birth            | <p>Primary source: VHA CDW<br/>Secondary source: USRDS</p> <p>Note: When there were discrepancies between the two data sources we used the CDW. Approximately 1% of values did not match between the two sources; approximately 60% of those had age discrepancies between 3 months and 3 years and the rest were &gt;3 years. We used the secondary source when the date of birth listed in the primary source was clearly incorrect (e.g., if it was after the date of death).</p>         |
| Sex/gender                   | <p>Primary source: VHA CDW<br/>Secondary source: USRDS</p> <p>Note: approximately 0.4% of participants had mismatched sex/gender. We used the primary source, but used the secondary source if sex was missing in the CDW.</p>                                                                                                                                                                                                                                                               |
| Race and Ethnicity           | <p>Primary source: VHA CDW<br/>Secondary source: USRDS</p> <p>Note: Approximately 18% of participants had mis-matched data on race/ethnicity (primarily due to being listed as “unknown” in one source). There were 950 participants with discrepancies between Black/white race, and 750 with discrepancies between Hispanic/non-Hispanic status. Both data sources are theoretically self-report. We used VHA data unless race or ethnicity were unknown, in which case we used USRDS.</p> |
| Year of dialysis initiation  | <p>USRDS</p> <p>Note: For participants with more than one start date, we used the first start date for which they were on dialysis for &gt;90 days (e.g. when someone was on dialysis for 60 days, discontinued, then started again 2 years later for several years, we used the second date).</p>                                                                                                                                                                                           |
| Pre-dialysis nephrology care | USRDS                                                                                                                                                                                                                                                                                                                                                                                                                                                                                        |

|                                    |                                                                                                                                                                                                                                                                                                                                                        |
|------------------------------------|--------------------------------------------------------------------------------------------------------------------------------------------------------------------------------------------------------------------------------------------------------------------------------------------------------------------------------------------------------|
| Cause of Kidney Failure            | USRDS                                                                                                                                                                                                                                                                                                                                                  |
| Vascular Access at Initiation      | USRDS                                                                                                                                                                                                                                                                                                                                                  |
| Incident dialysis modality         | USRDS<br><br>Note: We used the first modality for the first dialysis period that lasted at least 90 days.                                                                                                                                                                                                                                              |
| Medical Insurance                  | USRDS                                                                                                                                                                                                                                                                                                                                                  |
| Residence (Urban/rural/high rural) | VHA CDW                                                                                                                                                                                                                                                                                                                                                |
| Comorbidities                      | VHA CDW                                                                                                                                                                                                                                                                                                                                                |
| Date of death                      | Primary: VHA CDW<br>Secondary: USRDS<br><br>Note: We used USRDS when the date of death was missing from the CDW. When the two sources listed different dates, we looked for evidence of care in the CDW to try to determine the correct date of death (e.g. if there was care documented after the USRDS date of death we used the CDW date of death). |
| Date of kidney transplantation     | USRDS                                                                                                                                                                                                                                                                                                                                                  |

Abbreviations: VHA – Veterans Health Administration; CDW – Corporate Data Warehouse; USRDS – United States Renal Data System



**eTable 4.** *International Classification of Diseases (ICD) Codes for Covariables*

| Covariable                            | ICD 10 code                                                 | ICD 9 code                                             |
|---------------------------------------|-------------------------------------------------------------|--------------------------------------------------------|
| Atherosclerotic Heart Disease         | I21.x, I24.x, I25.x                                         | 410.x, 411.x, 412, 414.x                               |
| Cardiac failure                       | I09.81, I11.0, I13.x, I25.5, I42.x, I43, 150.x              | 398.91, 402.x, 404.x, 425.x, 428.x                     |
| Peripheral vascular disease           | 170.x                                                       | 440.x, 443.x                                           |
| Cerebral vascular disease             | G45.x, G46.x, I63.x, I67.x, I68.x                           | 362.34, 433.x, 434.x, 435.x, 436, 437.x,               |
| Hypertension                          | I10.x to I15.x                                              | 401.x to 405.x                                         |
| Diabetes                              | E10.x to E11.x                                              | 250.x                                                  |
| Cancer                                | C00.x to C43.x, C45.x to C76.x, C7A.x, C80.1, C81.x to C96. | 140.x to 172.x, 174.x to 195.x, 199.x, 200.x to 209.2x |
| Chronic obstructive pulmonary disease | J40.x to J44.x, J47.x                                       | 490.x to 492.x, 494.x to 496.x                         |
| History of drug dependence            | F11.x to F19.x                                              | 304.0x to 304.9x, 305.8x, 305.9x                       |
| History of alcohol dependence         | F10.x                                                       | 303.9x, 305.0x                                         |
| Post-traumatic stress disorder        | F43.1x                                                      | 309.81                                                 |
| Tobacco use                           | Z72.0, Z87.891, F17.x                                       | V15.82, 305.1                                          |

**eTable 5.** Outcomes at Various Time Points for Individuals With and Without Unstable Housing

| Time from 90 days after dialysis initiation | 0 days | 500 days | 1000 days | 1500 days | 2000 days |
|---------------------------------------------|--------|----------|-----------|-----------|-----------|
| <b>Unstable Housing</b>                     |        |          |           |           |           |
| <i>At Risk</i>                              | 771    | 500      | 273       | 93        | 11        |
| <i>Deceased since previous time</i>         | 0      | 120      | 89        | 33        | 10        |
| <i>Transplanted since previous time</i>     | 0      | 2        | 4         | 4         | 0         |
| <i>Censored since previous time</i>         | 0      | 149      | 134       | 143       | 72        |
|                                             |        |          |           |           |           |
| <b>Stable Housing</b>                       |        |          |           |           |           |
| <i>At Risk</i>                              | 24,918 | 14,853   | 7,605     | 2,887     | 444       |
| <i>Deceased since previous time</i>         | 0      | 4,312    | 2,849     | 1,468     | 532       |
| <i>Transplanted since previous time</i>     | 0      | 301      | 256       | 143       | 53        |
| <i>Censored since previous time</i>         | 0      | 5,452    | 4,143     | 3,107     | 1,858     |

**eTable 6.** Hazard of All-Cause Mortality Associated With Unstable Housing for Various Ages

| Age Group | Sub-distribution Hazard Ratios of All-cause Mortality for Unstable Housing vs Stable Housing (95% Confidence Interval) |                    |
|-----------|------------------------------------------------------------------------------------------------------------------------|--------------------|
|           | Model 1                                                                                                                | Model 2            |
| Age = 40  | 0.75 (0.51 - 1.12)                                                                                                     | 0.69 (0.46 - 1.02) |
| Age = 45  | 0.82 (0.60 - 1.14)                                                                                                     | 0.76 (0.55 - 1.05) |
| Age = 50  | 0.90 (0.70 - 1.16)                                                                                                     | 0.84 (0.65 - 1.08) |
| Age = 55  | 0.99 (0.81 - 1.20)                                                                                                     | 0.92 (0.76 - 1.12) |
| Age = 60  | 1.08 (0.93 - 1.25)                                                                                                     | 1.02 (0.88 - 1.18) |
| Age = 65  | 1.18 (1.04 - 1.34)                                                                                                     | 1.13 (0.99 - 1.28) |
| Age = 70  | 1.29 (1.11 - 1.50)                                                                                                     | 1.25 (1.07 - 1.45) |
| Age = 75  | 1.41 (1.15 - 1.73)                                                                                                     | 1.38 (1.12 - 1.69) |
| Age = 80  | 1.54 (1.18 - 2.01)                                                                                                     | 1.52 (1.16 - 1.99) |

Model 1: adjusted for age, age-squared, sex, race, ethnicity, year of dialysis initiation, pre-dialysis nephrology care, and age × unstable housing interaction term

Model 2: model 1 + incident dialysis modality, cause of kidney failure, incident vascular access, primary insurance, urban/rural, and comorbidities

**eTable 7.** Sensitivity Analysis: Analysis Without Age × Unstable Housing Interaction Term

| Model                                                            | Sub-distribution Hazard Ratio of All-cause Mortality for Unstable Housing vs Stable Housing (95% Confidence Interval) |
|------------------------------------------------------------------|-----------------------------------------------------------------------------------------------------------------------|
| n = 25,689, deaths = 9,435, transplants = 767, censored = 15,487 |                                                                                                                       |
| Model 1                                                          | 1.15 (1.01 – 1.31)                                                                                                    |
| Model 2                                                          | 1.10 (0.96 – 1.25)                                                                                                    |

Model 1: adjusted for age, age-squared, sex, race, ethnicity, year of dialysis initiation, pre-dialysis and nephrology care

Model 2: model 1 + incident dialysis modality, cause of kidney failure, incident vascular access, primary insurance, urban/rural, and comorbidities

**eTable 8.** Sensitivity Analysis: Including Individuals Aged Older Than 85 Years

| Model                                                                      | Hazard Ratio of All-cause Mortality<br>(95% Confidence Interval) |
|----------------------------------------------------------------------------|------------------------------------------------------------------|
| Overall, n = 26,955; deaths = 10,143, transplants = 767, censored = 16,045 |                                                                  |
| Model 1                                                                    | 1.15 (1.02 – 1.30)                                               |
| Model 2                                                                    | 1.10 (0.97 – 1.25)                                               |
| Age ≥75; n = 7,288, deaths = 3,574, transplants = 29, censored = 3,685     |                                                                  |
| Model 1                                                                    | 1.59 (1.19 – 2.12)                                               |
| Model 2                                                                    | 1.66 (1.24 – 2.22)                                               |

Model 1: adjusted for age, age-squared

Model 2: model 1 + sex, race, ethnicity, year of dialysis initiation, pre-dialysis incident dialysis modality, cause of kidney failure, incident vascular access, primary insurance, urban/rural, and comorbidities

**eTable 9.** Sensitivity Analysis: Analysis With Age as a Categorical Variable

| Model                                                            | Sub-distribution Hazard Ratio of All-cause Mortality for Unstable Housing vs Stable Housing (95% Confidence Interval) |
|------------------------------------------------------------------|-----------------------------------------------------------------------------------------------------------------------|
| n = 25,689, deaths = 9,435, transplants = 767, censored = 15,487 |                                                                                                                       |
| Model 1                                                          |                                                                                                                       |
| <50 years                                                        | 1.13 (0.51 – 2.47)                                                                                                    |
| 50-64 years                                                      | 0.99 (0.83 – 1.18)                                                                                                    |
| 65-74 years                                                      | 1.17 (0.94 – 1.47)                                                                                                    |
| ≥75 years                                                        | 1.54 (1.12 – 2.10)                                                                                                    |
| Model 2                                                          |                                                                                                                       |
| <50 years                                                        | 1.06 (0.49 – 2.27)                                                                                                    |
| 50-64 years                                                      | 0.94 (0.79 – 1.13)                                                                                                    |
| 65-74 years                                                      | 1.15 (0.92 – 1.44)                                                                                                    |
| ≥75 years                                                        | 1.54 (1.13 – 2.10)                                                                                                    |

Model 1: adjusted for sex, race, ethnicity, year of dialysis initiation, pre-dialysis nephrology care, and age group × unstable housing interaction term

Model 2: model 1 + incident dialysis modality, cause of kidney failure, incident vascular access, primary insurance, urban/rural, and comorbidities

**eTable 10.** Sensitivity Analysis: Sample Limited to Participants Who Did Not Have Discrepancies Between US Renal Data System and Veterans Health Administration Data on Date of Death

| Age Group                                                        | Sub-distribution Hazard Ratios of All-cause Mortality for Unstable Housing vs Stable Housing (95% Confidence Interval) |                    |
|------------------------------------------------------------------|------------------------------------------------------------------------------------------------------------------------|--------------------|
| n = 25,617, deaths = 9,363, transplants = 767, censored = 15,487 |                                                                                                                        |                    |
|                                                                  | Model 1                                                                                                                | Model 2            |
| At median age (68)                                               | 1.24 (1.08 – 1.42)                                                                                                     | 1.19 (1.04 – 1.37) |
| Age = 40                                                         | 0.74 (0.49 – 1.10)                                                                                                     | 0.67 (0.45 – 1.01) |
| Age = 45                                                         | 0.81 (0.58 – 1.12)                                                                                                     | 0.75 (0.54 – 1.04) |
| Age = 50                                                         | 0.89 (0.68 – 1.15)                                                                                                     | 0.83 (0.64 – 1.07) |
| Age = 55                                                         | 0.97 (0.80 – 1.18)                                                                                                     | 0.92 (0.75 – 1.12) |
| Age = 60                                                         | 1.07 (0.92 – 1.24)                                                                                                     | 1.01 (0.87 – 1.18) |
| Age = 65                                                         | 1.17 (1.03 – 1.33)                                                                                                     | 1.12 (0.99 – 1.28) |
| Age = 70                                                         | 1.29 (1.10 – 1.50)                                                                                                     | 1.24 (1.07 – 1.45) |
| Age = 75                                                         | 1.41 (1.15 – 1.73)                                                                                                     | 1.38 (1.12 – 1.69) |
| Age = 80                                                         | 1.55 (1.18 – 2.03)                                                                                                     | 1.53 (1.16 – 2.00) |

Model 1: adjusted for age, age-squared, sex, race, ethnicity, year of dialysis initiation, pre-dialysis nephrology care, and age x unstable housing interaction term

Model 2: model 1 + incident dialysis modality, cause of kidney failure, incident vascular access, primary insurance, urban/rural, and comorbidities

**eTable 11.** Sensitivity Analysis: Sample Limited to Participants Who Were Screened for Unstable Housing Within 1 Year Before Dialysis Initiation

| Age Group                                                        | Sub-distribution Hazard Ratio of All-cause Mortality for Unstable Housing vs Stable Housing (95% Confidence Interval) |                    |
|------------------------------------------------------------------|-----------------------------------------------------------------------------------------------------------------------|--------------------|
| n = 23,644, deaths = 8,373, transplants = 708, censored = 14,563 |                                                                                                                       |                    |
|                                                                  | Model 1                                                                                                               | Model 2            |
| At median age (68)                                               | 1.27 (1.03 – 1.57)                                                                                                    | 1.24 (1.01 – 1.53) |
| Age = 40                                                         | 0.92 (0.54 – 1.58)                                                                                                    | 0.86 (0.50 – 1.47) |
| Age = 45                                                         | 0.98 (0.63 – 1.52)                                                                                                    | 0.92 (0.59 – 1.42) |
| Age = 50                                                         | 1.03 (0.73 – 1.46)                                                                                                    | 0.98 (0.70 – 1.38) |
| Age = 55                                                         | 1.10 (0.85 – 1.42)                                                                                                    | 1.05 (0.81 – 1.35) |
| Age = 60                                                         | 1.16 (0.95 – 1.41)                                                                                                    | 1.12 (0.92 – 1.36) |
| Age = 65                                                         | 1.23 (1.02 – 1.48)                                                                                                    | 1.19 (0.99 – 1.44) |
| Age = 70                                                         | 1.30 (1.03 – 1.64)                                                                                                    | 1.27 (1.01 – 1.61) |
| Age = 75                                                         | 1.38 (1.01 – 1.89)                                                                                                    | 1.36 (1.00 – 1.86) |
| Age = 80                                                         | 1.46 (0.97 – 2.19)                                                                                                    | 1.45 (0.97 – 2.18) |

Model 1: adjusted for age, age-squared, sex, race, ethnicity, year of dialysis initiation, pre-dialysis nephrology care, and age x unstable housing interaction term

Model 2: model 1 + incident dialysis modality, cause of kidney failure, incident vascular access, primary insurance, urban/rural, and comorbidities

Note: There were 771 with unstable housing in the original analysis (within 3-years of dialysis initiation), and 356 of those had a positive housing screen within the year before starting dialysis.
