# Supplementary material for: Unstable Housing and Mortality Among US Veterans Receiving Dialysis
Source: PubMed Central journal article supplement (PMC10663965; doi:10.1001/jamanetworkopen.2023.44448), 2023-11-21
Supplement: jamanetwopen-e2344448-s002.pdf [file jamanetwopen-e2344448-s002.pdf]

## Data Sharing Statement

Novick. Unstable Housing and Mortality Among US Veterans Receiving Dialysis. *JAMA Netw Open*. Published November 21, 2023. doi:10.1001/jamanetworkopen.2023.44448

### Data

**Data available:** No
